# Supplementary material for: Effects of different extrusion temperatures on extrusion behavior, phenolic acids, antioxidant activity, anthocyanins and phytosterols of black rice
Source: PubMed Central journal article supplement (PMC9078409; doi:10.1039/c7ra13329d), 2018-02-14
Supplement: RA-008-C7RA13329D-s001.pdf [file RA-008-C7RA13329D-s001.pdf]

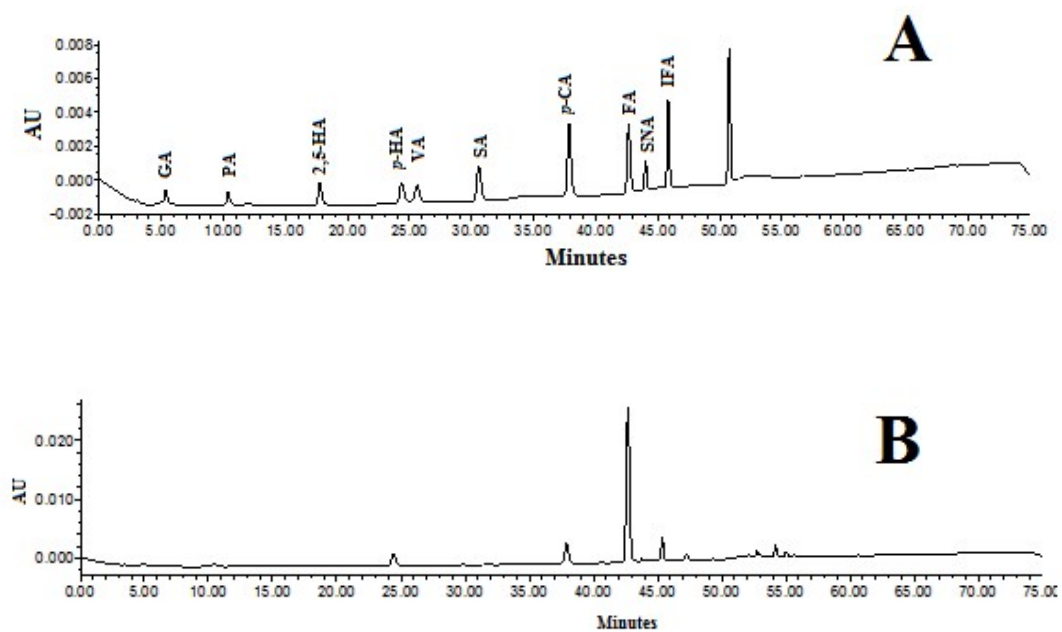

Fig 1 the HPLC chromatogram of phenolic acid standards (A) and sample (B)

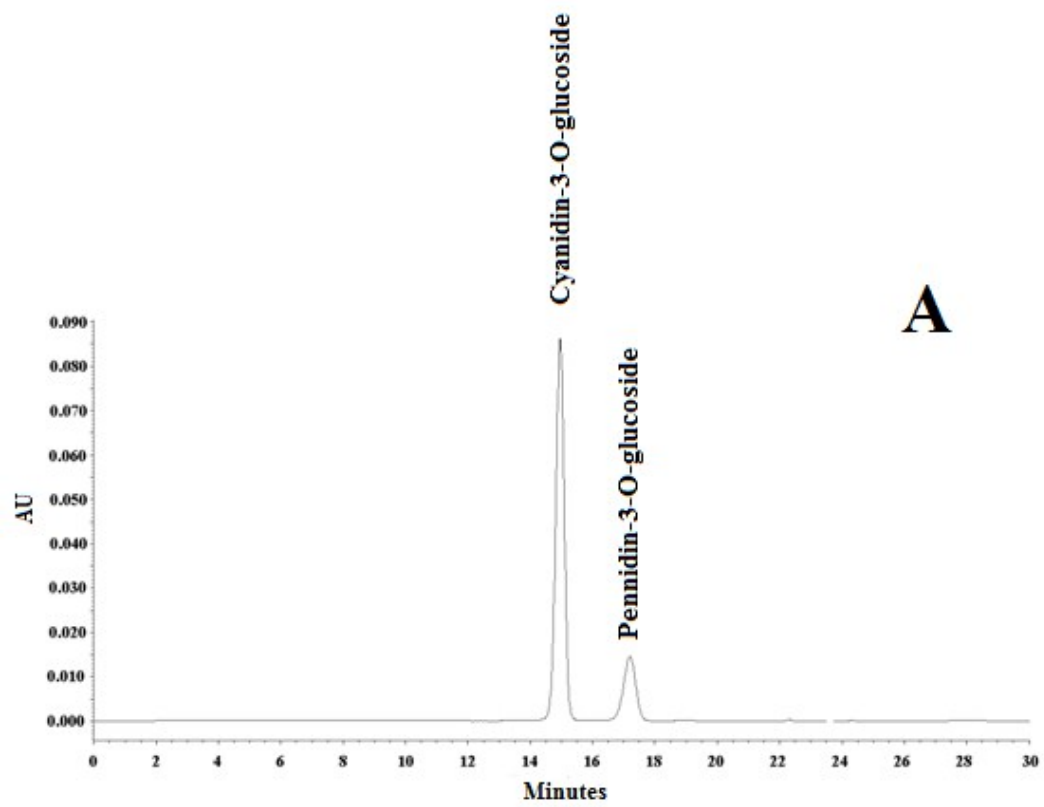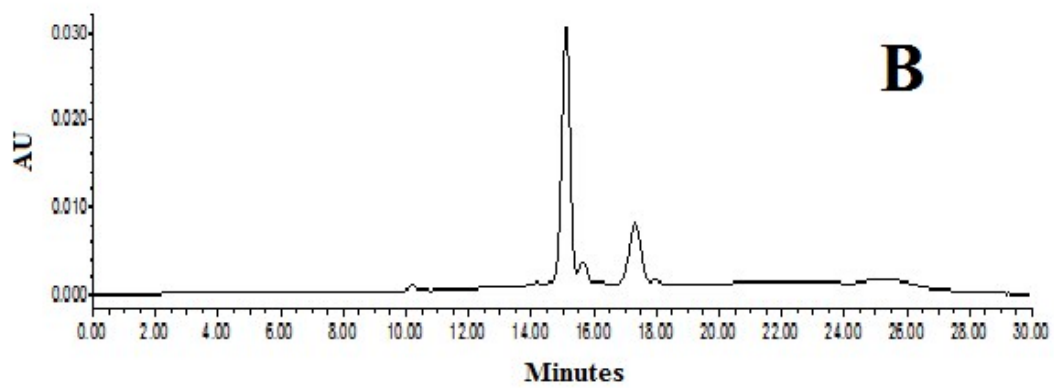

Fig 2 the HPLC chromatogram of anthocyanin standards (A) and sample (B)

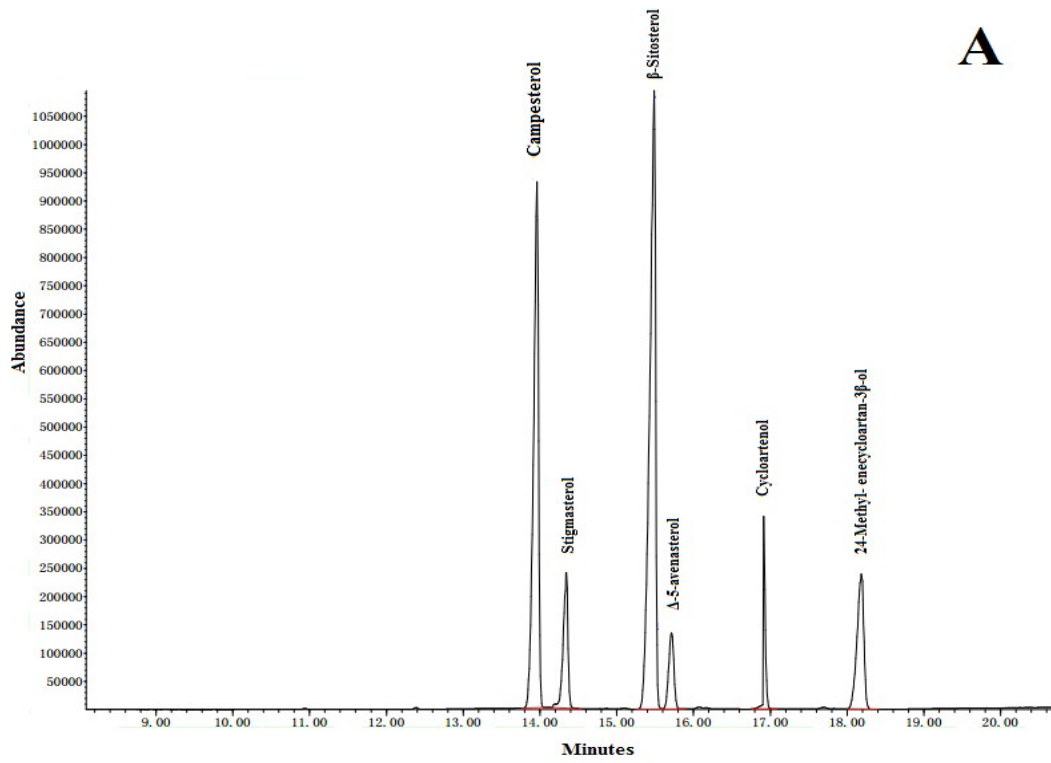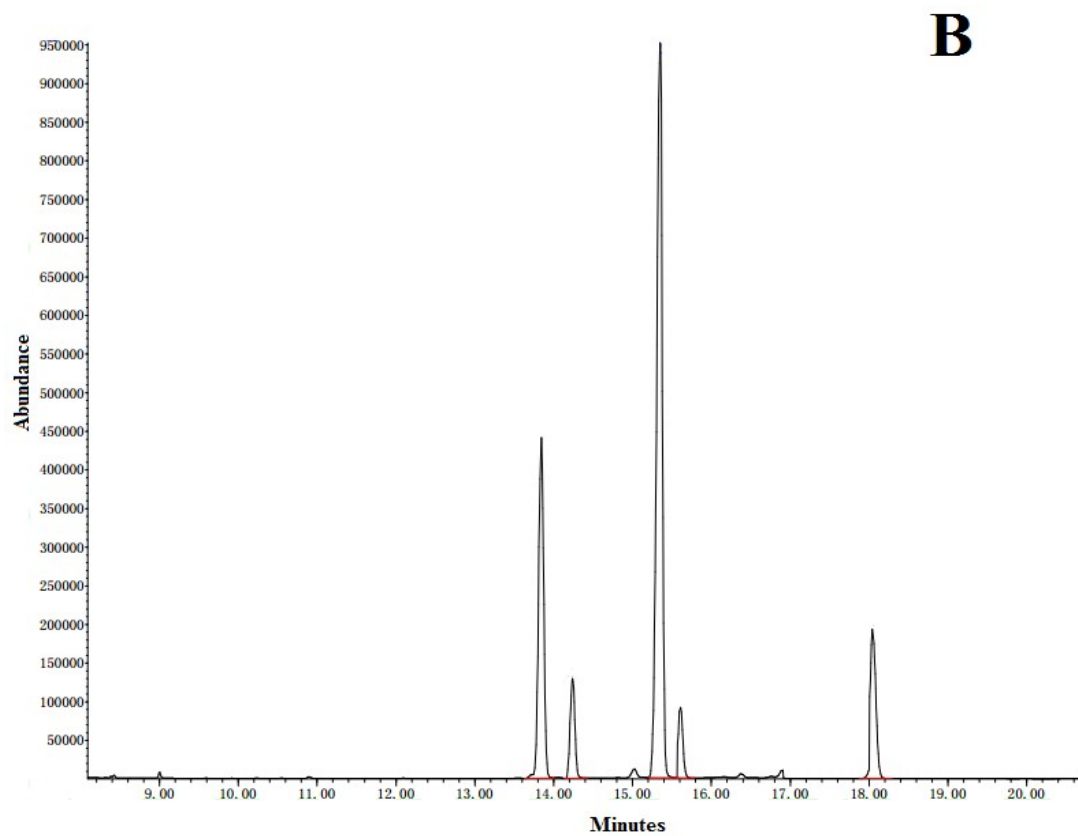

Fig 3 the GC-MS chromatogram of sterol standards (A) and sample (B)
